# Supplementary material
Source: MDPI journal article supplement (https://www.mdpi.com/2071-1050/14/13/7644)
Supplement: s1 [file s1]

**Table S1.** Mean and contribution rate of topography factors, soil factors, species diversity factors and structural diversity factors variables of each 10 m × 10 m quadrat and Correlation between them with the PCA axes.

|                              | Topography PCA           |        |
|------------------------------|--------------------------|--------|
|                              | Axis 1                   | Axis 2 |
| Proportion of Variance (%)   | 31.53                    | 30.21  |
| Cumulative Proportion (%)    | 31.53                    | 61.47  |
| Elevation (ELE) (m)          | -0.063                   | -0.865 |
| Slope (SLO) (°)              | -0.591                   | -0.478 |
| Cos (Aspect) (ASP)           | 0.768                    | -0.267 |
| Convexity (CON)              | 0.467                    | -0.632 |
| Rock outcrop ratio (ROR) (%) | 0.645                    | 0.252  |
|                              | Soil factors PCA         |        |
|                              | Axis 1                   | Axis 2 |
| Proportion of Variance (%)   | 77.26                    | 15.38  |
| Cumulative Proportion (%)    | 77.26                    | 93.01  |
| pH                           | -0.882                   | -0.133 |
| SOM                          | -0.984                   | -0.094 |
| TN                           | -0.990                   | -0.053 |
| TP                           | -0.924                   | 0.220  |
| TK                           | 0.084                    | 0.989  |
| AN                           | -0.984                   | -0.088 |
| AP                           | -0.961                   | -0.113 |
| AK                           | -0.855                   | 0.392  |
|                              | Species diversity PCA    |        |
|                              | Axis 1                   | Axis 2 |
| Proportion of Variance (%)   | 74.45                    | 22.43  |
| Cumulative Proportion (%)    | 74.45                    | 96.88  |
| <i>R</i>                     | -0.837                   | 0.514  |
| <i>H'</i>                    | -0.972                   | 0.213  |
| <i>D</i>                     | -0.962                   | -0.160 |
| <i>E</i>                     | -0.647                   | -0.745 |
|                              | Structural diversity PCA |        |
|                              | Axis 1                   | Axis 2 |
| Proportion of Variance (%)   | 49.98                    | 26.30  |
| Cumulative Proportion (%)    | 49.98                    | 76.28  |
| <i>SD<sub>ba</sub></i>       | -0.939                   | 0.258  |
| <i>CV<sub>ba</sub></i>       | -0.951                   | 0.213  |
| <i>H'<sub>ba</sub></i>       | -0.312                   | -0.698 |
| Stand density (DEN)          | -0.339                   | -0.673 |
